# Supplementary material for: Genome-Wide Identification and Development of LTR Retrotransposon-Based Molecular Markers for the Melilotus Genus
Source: MDPI journal article supplement (doi:10.3390/plants10050890), 2021-04-28
Supplement: s1 [file s1]

| Code | Accession number | Origin                  | Latitude | Longitude |
|------|------------------|-------------------------|----------|-----------|
| 1    | PI 662299        | Vienna, Austria         | N 48°20' | E 16°33'  |
| 2    | PI 553075        | Poland                  | N 51°48' | E 19°06'  |
| 3    | PI 366038        | Buenos Aires, Argentina | S 34°35' | W 58°26'  |
| 4    | PI 478773        | Florida, United States  | N 27°39' | W 81°30'  |
| 5    | PI 508617        | Santa Fe                | S 32°5'  | E 1°29'   |
| 6    | PI 342796        | Hungary                 | N 47°05' | E 19°36'  |
| 7    | PI 662296        | Saskatchewan, Canada    | —        | —         |
| 8    | PI 478468        | Bolivia                 | —        | —         |
| 9    | PI 342765        | France                  | N 46°15' | W 2°16'   |
| 10   | PI 494706        | Romania                 | N 44°12' | E 28°36'  |
| 11   | ZXY06P-1732      | Russian Federation      | N 62°    | W 9°      |
| 12   | Zhongxu-1226     | —                       | —        | —         |
| 13   | ZXY07P-3150      | —                       | —        | —         |
| 14   | ZXY05P-983       | Russian Federation      | —        | —         |
| 15   | HB2009-153       | Xinyang, China          | N 32°10' | E 114°07' |
