# Supplementary material for: Genome-Wide Identification and Development of LTR Retrotransposon-Based Molecular Markers for the Melilotus Genus
Source: MDPI journal article supplement (doi:10.3390/plants10050890), 2021-04-28
Supplement: s1 [file s1]

| Primer code | Type | Primer sequence                                    | Allele size range (kb) | N <sub>A</sub> | He   | PIC  |
|-------------|------|----------------------------------------------------|------------------------|----------------|------|------|
| 25          | RBIP | F:GAGAACTGAGAAGAGGGTC<br>R:CTCCACCTTGACTTGAATC     | 0.2-0.4                | 9              | 0.83 | 0.81 |
| 40          | RBIP | F:GAAAGGATTCTGAGCGTAG<br>R:ATACTCTCCACCACTGTCA     | 0.5-1.0                | 5              | 0.63 | 0.56 |
| 41          | RBIP | F:GAAAGGATTCTGAGCGTAG<br>R:GTAATACTCTCCACCACTGTC   | 0.5-1.0                | 8              | 0.83 | 0.81 |
| 45          | IRAP | F:TATGCTTCAACCTGAGGG<br>R:GTTCAATTTCTGCTCGCTC      | 0.3-0.7                | 10             | 0.7  | 0.65 |
| 46          | RBIP | F:GAAAGTCTAATGCCGAGG<br>R:AATACTCTCCACCACGGT       | 0.2-0.7                | 9              | 0.7  | 0.65 |
| 54          | RBIP | F:TCTCAGACATAGAACCCG<br>R:AGTGATGGTAACCAACC        | 0.3-0.7                | 10             | 0.79 | 0.76 |
| 55          | RBIP | F:GTGTCCACAAAGGATTCC<br>R:TCTCCACAAGACCACTTC       | 0.15-0.4               | 8              | 0.73 | 0.69 |
| 62          | IRAP | F:ATTTAGTGGCAGCCCTTC<br>R:GACCTTTCTTTCCGCATC       | 0.1-1.0                | 15             | 0.84 | 0.82 |
| 67          | RBIP | F:GACAACTTGAACGGACAAAC<br>R:AGGGTAAAGGCTAAGGGAG    | 0.15-0.3               | 6              | 0.73 | 0.68 |
| 68          | RBIP | F:GGGACAACTACATAACTTGG<br>R:GCTGCCACTAAATCAGAG     | 0.3-0.7                | 11             | 0.83 | 0.81 |
| 69          | RBIP | F:TCATTACCTATTGCTCTCC<br>R:TGCTTCCTTGACAGTCTTAG    | 0.15-0.3               | 6              | 0.69 | 0.66 |
| 74          | RBIP | F:TTCATACTCCGAGAG<br>R:GGATGTCCATTAGAGGCT          | 0.15-0.2               | 4              | 0.43 | 0.4  |
| 76          | RBIP | F:TGTGTGTGTGTCTGTCT<br>R:AACCTCGTAGTTCGGGTA        | 0.3-0.5                | 5              | 0.78 | 0.74 |
| 78          | RBIP | F:CATCCTGAATAGAGTCCCT<br>R:ATCGGTATCCCTTAGCAC      | 0.15-0.3               | 4              | 0.57 | 0.52 |
| 83          | RBIP | F:CTGTAGTATTCAAGGGTGG<br>R:GAAGCCATTCTAAGGGTC      | 0.2-0.5                | 7              | 0.56 | 0.54 |
| 93          | RBIP | F:CTCCTTGACTGTTGCCATTA<br>R:GGGAAGAAACCCTGGATT     | 0.2-0.4                | 5              | 0.37 | 0.35 |
| 95          | RBIP | F:CCTGAAGAAGAATGGTCC<br>R:GTGGTAAGAAGTTGAAGCC      | 0.1-0.3                | 8              | 0.81 | 0.78 |
| 105         | RBIP | F:TCTCAACTCCAATGGCAG<br>R:TTCAGAGGCAGAAGCATC       | 0.15-0.3               | 7              | 0.8  | 0.77 |
| 138         | IRAP | F:GCATTGTTGTCACAGTCAAG<br>R:GCAAGTTACTCTTCATACCTGG | 0.5-1.0                | 4              | 0.67 | 0.61 |
| 146         | RBIP | F:ATCCCTTCTCTCCTTCCCT<br>R:TCACCTTGATACTTGCCG      | 0.15-0.3               | 5              | 0.78 | 0.75 |
| 148         | IRAP | F:GGTGTGGACAGATAGTAAGG                             | 0.15-0.3               | 4              | 0.71 | 0.66 |

|     |      |                                                    |          |    |      |      |
|-----|------|----------------------------------------------------|----------|----|------|------|
|     |      | R:GAGTTGGTAGGTTGAGTTTG                             |          |    |      |      |
| 149 | RBIP | F:CTAAATGGAGGGAAGAGAGA<br>R:GTGACAACCTTGAGTGCCA    | 0.2-0.3  | 5  | 0.74 | 0.7  |
| 152 | IRAP | F:CTTATCTCCCTCAACAAGC<br>R:CTACAGAAATGGCGACTTC     | 0.15-0.2 | 3  | 0.61 | 0.53 |
| 153 | IRAP | F:CAGCAACATAACGAGAACG<br>R:CCGAGAGAAATGAGAGAGAAAGT | 0.4-0.7  | 8  | 0.77 | 0.75 |
| 155 | RBIP | F:CTTGTTGCGTTAGTGTGC<br>R:AACTGGGATGGTCCGTAT       | 0.5-1.0  | 6  | 0.72 | 0.68 |
| 169 | IRAP | F:GTGAATGTGTGTGTGTGC<br>R:CTTTGAGCAAGTGTGTAGGT     | 0.3-0.5  | 7  | 0.83 | 0.81 |
| 170 | RBIP | F:GTGACGAGAAGAAGAAAAGG<br>R:CACAGATTTACCACTGGC     | 0.2-0.3  | 4  | 0.69 | 0.63 |
| 183 | RBIP | F:T TACTAATCCCACCACCC<br>R:GACGAAGGAGAAGAGAATG     | 0.3-0.5  | 5  | 0.73 | 0.68 |
| 196 | RBIP | F:GATTGTTCCGATTCAGGC<br>R:AGGACTTGCTGGATTGG        | 0.2-0.4  | 6  | 0.78 | 0.75 |
| 209 | RBIP | F:GTCTCACACACAAGATTCC<br>R:GGTGGTTAGGGAGGTTAT      | 0.15-0.4 | 7  | 0.84 | 0.82 |
| 210 | RBIP | F:GTCTCACACACAAGATTCC<br>R:GGTGGTTAGGGAGGTTAT      | 0.15-0.3 | 6  | 0.72 | 0.67 |
| 226 | RBIP | F:GCTTCAAGTGTGGTGGAT<br>R:AACGCAACCCTTCTCTCT       | 0.2-0.3  | 5  | 0.68 | 0.63 |
| 229 | RBIP | F:ATCGGAATGGACTCTACC<br>R:GTGTATGCGTATGTGTGAG      | 0.1-0.3  | 10 | 0.83 | 0.81 |
| 277 | RBIP | F:TCAGATGGAGTTGTGAGG<br>R:GAGGCTAAACCCTACGAT       | 0.2-0.3  | 3  | 0.62 | 0.54 |
| 280 | RBIP | F:GAACTGTATGTGTCCAAGG<br>R:CCAGGAAGAGAACAAGAC      | 0.2-0.3  | 4  | 0.68 | 0.63 |
| 281 | RBIP | F:AGAGGAAGAAGACAACCG<br>R:GTCACAAAGGATGAGGGT       | 0.15-0.3 | 4  | 0.45 | 0.42 |
| 283 | IRAP | F:CCCGAATCTAAGGTCAAAGT<br>R:CACGCAAGAAACACATCAC    | 0.15-0.5 | 10 | 0.86 | 0.84 |
| 284 | IRAP | F:ATTTGGACCAGGCACACT<br>R:AAGCACTCCGTCATCGTA       | 0.1-0.3  | 6  | 0.7  | 0.65 |
| 286 | IRAP | F:CGGATGATACGAAAGTGAG<br>R:GCTTCTGTTGTTAGCCCAT     | 0.3-0.5  | 4  | 0.66 | 0.6  |
| 290 | RBIP | F:ACTAAGGTTCCAGGCTGT<br>R:GACTCATCCAACAATCCC       | 0.2-0.4  | 3  | 0.4  | 0.37 |
| 293 | RBIP | F:CGGCAAGGTAGAGAGAAGT<br>R:AATGGGCTTTGGAGTAGG      | 0.1-0.3  | 8  | 0.79 | 0.76 |
| 300 | IRAP | F:CTCTCACACATACACAAAGG<br>R:ATCTGGAGTTCTGGAAGTC    | 0.2-0.5  | 5  | 0.7  | 0.66 |
| 301 | RBIP | F:CAAGCACGGTAAGTTAGC                               | 0.2-0.4  | 4  | 0.68 | 0.62 |

|      |      |                        |          |      |      |      |
|------|------|------------------------|----------|------|------|------|
|      |      | R:CGAGTTCAAGAGCACCTT   |          |      |      |      |
| 302  | RBIP | F:AAAGAGGACAAAGACCCG   | 0.3-0.5  | 3    | 0.5  | 0.38 |
|      |      | R: TAGTCAACGCACATACGC  |          |      |      |      |
| 324  | IRAP | F:GGTATCAGAGCCTGGTTAG  | 0.2-0.3  | 4    | 0.56 | 0.5  |
|      |      | R:AAACAGTCCTCAGTTCCTC  |          |      |      |      |
| 336  | IRAP | F:GAGGAAGTAGACGCTTATTG | 0.2-0.4  | 5    | 0.76 | 0.72 |
|      |      | R:GTTGGTGGTGTCAATCAC   |          |      |      |      |
| 350  | RBIP | F:TCACAGAGTTTGAGTCCC   | 0.15-0.4 | 7    | 0.84 | 0.82 |
|      |      | R:GAAGAAGAAGGTGGGTTC   |          |      |      |      |
| Mean |      |                        |          | 6.21 | 0.70 | 0.66 |

NA: number of alleles, He: expected heterozygosity, PIC: polymorphic information content, RBIP: retrotransposon-based insertion polymorphisms, IRAP: inter-retrotransposon amplified polymorphisms.
