# Supplementary material for: Genome-Wide Identification and Development of LTR Retrotransposon-Based Molecular Markers for the Melilotus Genus
Source: MDPI journal article supplement (doi:10.3390/plants10050890), 2021-04-28
Supplement: s1 [file s1]

| Marker name | TE ID            | Type | Forward primer (5'-3') | Reverse primer (5'-3') | Class        | Chromosome                        |
|-------------|------------------|------|------------------------|------------------------|--------------|-----------------------------------|
| Ma_LTR_1    | repeat_TE0090401 | RBIP | CCATTGATTGAGGCAGTAG    | CAAGTCTATGTTCCAAACCC   | <i>Copia</i> | Group3                            |
| Ma_LTR_2    | repeat_TE0090415 | RBIP | TTGTTCAAGGAGTTCCAGG    | CACATAACCTTTCTTCCACC   | <i>Copia</i> | Group3                            |
| Ma_LTR_3    | repeat_TE0090644 | RBIP | CACATAACCTTGCTTCCG     | CGTAATACTCTCCACCACG    | <i>Copia</i> | Group3                            |
| Ma_LTR_4    | repeat_TE0090728 | RBIP | GTTCCAGAAGTTGAGACT     | GCAATAAAGTGACCAGGC     | <i>Copia</i> | Group3                            |
| Ma_LTR_5    | repeat_TE0090729 | RBIP | GATTGATACTCCTGAACCTC   | TCCTTCCTTGTAGACACAC    | <i>Copia</i> | Group3                            |
| Ma_LTR_6    | repeat_TE0090729 | IRAP | GATGACAAAGAGCCTGAC     | CATTGAGATGAGACCAAGC    | <i>Copia</i> | Group3                            |
| Ma_LTR_7    | repeat_TE0090866 | ISBP | CCCACAACCTCCTCAACATT   | CACACAAAGCCTATTTTCAGG  | <i>Copia</i> | Group3                            |
| Ma_LTR_8    | repeat_TE0128816 | RBIP | CTTATTCCCATCTTGCCC     | CCTCTTGTAAGTCGTTTG     | <i>Copia</i> | Lachesis_group3:72975954-72981950 |
| Ma_LTR_9    | repeat_TE0128835 | RBIP | CAAGTTGTATGGGTATCCTC   | GCGTAGAGTAACCACTGTC    | <i>Copia</i> | Lachesis_group3:72994466-72996400 |
| Ma_LTR_10   | repeat_TE0128985 | IRAP | CCCATTGATTGAGGCAGT     | TCTATGTTCCAAACCCTGAG   | <i>Copia</i> | Lachesis_group3:73054159-73063470 |
| Ma_LTR_11   | repeat_TE0128987 | RBIP | AGCCACTCTAAAGGTCTG     | GTCTATGTTCCAAACCCTG    | <i>Copia</i> | Lachesis_group3:73063736-73070466 |
| Ma_LTR_12   | repeat_TE0128991 | IRAP | GTTCCGAGCATTAGAAGC     | CCAACCTGTTTACAGCCC     | <i>Copia</i> | Lachesis_group3:73071984-73073433 |
| Ma_LTR_13   | repeat_TE0128992 | IRAP | GTTCCGAGCATTAGAAGC     | GAGCCAACTTGTTTACAGC    | <i>Copia</i> | Lachesis_group3:73072235-73074083 |
| Ma_LTR_14   | repeat_TE0129038 | IRAP | GCTTCCGTCCTTCTATGA     | GACCAAGTGTATCGCCTT     | <i>Copia</i> | Lachesis_group3:73099627-73100311 |
| Ma_LTR_15   | repeat_TE0140174 | RBIP | AGATTTCTCACTCTCAGGG    | GTTGGTTAACTTCTAAGGC    | <i>Copia</i> | Lachesis_group3:81546882-81547720 |
| Ma_LTR_16   | repeat_TE0140260 | RBIP | GGCTTATCAATGGAGTCAAC   | GACAGGAAATCAACTTCTGG   | <i>Copia</i> | Lachesis_group3:81571424-81573046 |
| Ma_LTR_17   | repeat_TE0140261 | IRAP | GAAGAGGCAACAAGAGTTTG   | AAGAAGTGATGAGGGCAC     | <i>Copia</i> | Lachesis_group3:81573045-81574425 |

|           |                  |       |                      |                       |              |                                   |
|-----------|------------------|-------|----------------------|-----------------------|--------------|-----------------------------------|
| Ma_LTR_18 | repeat_TE0140262 | IRAP  | CACTGCTTCGTGATACCA   | CCCTTTACATCCTCAACAG   | <i>Copia</i> | Lachesis_group3:81573869-81576068 |
| Ma_LTR_19 | repeat_TE0140548 | ISBP  | GGGACAACTACATAACTTGG | GCTGCCACTAAATCAGAG    | <i>Copia</i> | Lachesis_group3:81703352-81710186 |
| Ma_LTR_20 | repeat_TE0165557 | RBIP  | ATGATAGATGGAGCCGTC   | GATGTCTTTCTTGAGCAGC   | <i>Copia</i> | Lachesis_group3:96037227-96040455 |
| Ma_LTR_21 | repeat_TE0165557 | REMAP | TCACATCACGAGTATGGG   | TTAGCCAAAGAGGACGAG    | <i>Copia</i> | Lachesis_group3:96037227-96040455 |
| Ma_LTR_22 | repeat_TE0165599 | RBIP  | CAATGTGAGTCCTAATCTGG | ATGGGAATGGTGAGAGGT    | <i>Copia</i> | Lachesis_group3:96052163-96056458 |
| Ma_LTR_23 | repeat_TE0165599 | RBIP  | CACCTTCTTCAAGTAACCAG | AGGAGGAGATTGGAAAGC    | <i>Copia</i> | Lachesis_group3:96052163-96056458 |
| Ma_LTR_24 | repeat_TE0165599 | IRAP  | CCCTATCACGGTTTCTAATG | CTGGTATTGACTGAAGACACC | <i>Copia</i> | Lachesis_group3:96052163-96056458 |
| Ma_LTR_25 | repeat_TE0240683 | RBIP  | GAGAACTGAGAAGAGGGTC  | CTCCACCTTGACTTGAATC   | <i>Copia</i> | Lachesis_group4:13608775-13610337 |
| Ma_LTR_26 | repeat_TE0240741 | RBIP  | CAATCTCCACCTTGACTCT  | TGGCTCTATCTACCACTCA   | <i>Copia</i> | Lachesis_group4:13649291-13654820 |
| Ma_LTR_27 | repeat_TE0240782 | IRAP  | CAGGAACATCACACAGGA   | CTTGGAAGACCTTGACAAC   | <i>Copia</i> | Lachesis_group4:13667161-13668148 |
| Ma_LTR_28 | repeat_TE0240782 | RBIP  | GACACTAATGGCTTGGAC   | ACCTTGGAAGACCTTGAC    | <i>Copia</i> | Lachesis_group4:13667161-13668148 |
| Ma_LTR_29 | repeat_TE0240956 | RBIP  | GGAAGTCAAAGAAGCAGG   | ACACCATCACTCCTCCTTG   | <i>Copia</i> | Lachesis_group4:13756592-13761111 |
| Ma_LTR_30 | repeat_TE0241043 | RBIP  | CAAGTATTGGAGGCTTCC   | GGACGGGTTTGAGTATGA    | <i>Copia</i> | Lachesis_group4:13822302-13827612 |
| Ma_LTR_31 | repeat_TE0241043 | RBIP  | AGCAGAGGACCGACTAACA  | TGACATCATCACCCGTTT    | <i>Copia</i> | Lachesis_group4:13822302-13827612 |
| Ma_LTR_32 | repeat_TE0241043 | IRAP  | AGTTGCTTGAGATGGCTG   | CACTCTTGGCATTGTAACC   | <i>Copia</i> | Lachesis_group4:13822302-13827612 |
| Ma_LTR_33 | repeat_TE0241068 | RBIP  | GTCAGTTAGGTCGGGTTA   | CACTATGGAATCTGGGATG   | <i>Copia</i> | Lachesis_group4:13834901-13842555 |
| Ma_LTR_34 | repeat_TE0241730 | RBIP  | CGGACAAATGTGATAAGAGC | CGGATGTAACAAGACCGA    | <i>Copia</i> | Lachesis_group4:14110161-14114831 |
| Ma_LTR_35 | repeat_TE0241730 | RBIP  | CTTGTGTCAAATGAGATGGC | ATTGGGTCTGAACTGGGT    | <i>Copia</i> | Lachesis_group4:14110161-14114831 |

|           |                  |       |                      |                        |              |                                   |
|-----------|------------------|-------|----------------------|------------------------|--------------|-----------------------------------|
| Ma_LTR_36 | repeat_TE0291411 | REMAP | GGTTGATGATGATGAGGAG  | GAGACAGATTTAGAGCCG     | <i>Copia</i> | Lachesis_group4:39070591-39072153 |
| Ma_LTR_37 | repeat_TE0291525 | IRAP  | GGAAGAAAGCCAAGTATCTC | CAATCCATCCACCATCTG     | <i>Copia</i> | Lachesis_group4:39107485-39110976 |
| Ma_LTR_38 | repeat_TE0320379 | RBIP  | GTAGTGCTTTCTTGAATGGG | CACAATACTCGTAACACGCT   | <i>Copia</i> | Lachesis_group4:58061857-58066116 |
| Ma_LTR_39 | repeat_TE0320389 | RBIP  | AACGAAACTGACTCCGAG   | TGGTAAGGTCTCAACCGT     | <i>Copia</i> | Lachesis_group4:58072301-58073824 |
| Ma_LTR_40 | repeat_TE0320561 | RBIP  | GAAAGGATTCTGAGCGTAG  | ATACTCTCCACCACTGTCA    | <i>Copia</i> | Lachesis_group4:58150099-58153483 |
| Ma_LTR_41 | repeat_TE0320562 | RBIP  | GAAAGGATTCTGAGCGTAG  | GTAATACTCTCCACCACTGTC  | <i>Copia</i> | Lachesis_group4:58151507-58155892 |
| Ma_LTR_42 | repeat_TE0320562 | IRAP  | TATGCTTCAACCTGAGGG   | GTTCAATTTCTGCTCGCTC    | <i>Copia</i> | Lachesis_group4:58151507-58155892 |
| Ma_LTR_43 | repeat_TE0320562 | RBIP  | TGTTATGCTGCCGCTACT   | ACAATGGTCCTAAGTCCC     | <i>Copia</i> | Lachesis_group4:58151507-58155892 |
| Ma_LTR_44 | repeat_TE0320563 | IRAP  | GTTGAGCGAGCAGAAATG   | AGTAGCGGCAGCATAACA     | <i>Copia</i> | Lachesis_group4:58153478-58156630 |
| Ma_LTR_45 | repeat_TE0320563 | IRAP  | TATGCTTCAACCTGAGGG   | GTTCAATTTCTGCTCGCTC    | <i>Copia</i> | Lachesis_group4:58153478-58156630 |
| Ma_LTR_46 | repeat_TE0438065 | RBIP  | GAAAGTCTAATGCCGAGG   | AATACTCTCCACCACGGT     | <i>Copia</i> | Lachesis_group5:15775517-15781077 |
| Ma_LTR_47 | repeat_TE0438240 | RBIP  | ACCCACACTTGAGTAGCA   | CCCAAATAGTATGGTAGGC    | <i>Copia</i> | Lachesis_group5:15849444-15851675 |
| Ma_LTR_48 | repeat_TE0520883 | RBIP  | TGATGACTGAACACTGACC  | TTGCTATTCCTGGACACC     | <i>Copia</i> | Lachesis_group5:55296943-55301324 |
| Ma_LTR_49 | repeat_TE0520888 | RBIP  | CTAACGACTTCCCAGCAA   | GCCTTTACCAAATCCGAC     | <i>Copia</i> | Lachesis_group5:55305642-55307992 |
| Ma_LTR_50 | repeat_TE0520888 | RBIP  | CGTTTATTGACTCAGTTGGG | GCTCTTTACTCCTCTCTCACAA | <i>Copia</i> | Lachesis_group5:55305642-55307992 |
| Ma_LTR_51 | repeat_TE0520988 | RBIP  | ACCTGATTGCTTCCAGTC   | CTGATGTTGCTCATAACGG    | <i>Copia</i> | Lachesis_group5:55359445-55365106 |
| Ma_LTR_52 | repeat_TE0520988 | RBIP  | GTCCATCTGCTGTAGTCAT  | CAACATCTGGTAAGAGGC     | <i>Copia</i> | Lachesis_group5:55359445-55365106 |
| Ma_LTR_53 | repeat_TE0521061 | RBIP  | TCTCAGACATAGAACCCG   | GTGATGGTAACCCAACCT     | <i>Copia</i> | Lachesis_group5:55423972-55424881 |

|           |                  |      |                       |                      |              |                                     |
|-----------|------------------|------|-----------------------|----------------------|--------------|-------------------------------------|
| Ma_LTR_54 | repeat_TE0521060 | RBIP | TCTCAGACATAGAACCCG    | AGTGATGGTAACCCAACC   | <i>Copia</i> | Lachesis_group5:55423842-55424825   |
| Ma_LTR_55 | repeat_TE0557485 | RBIP | GTGTCCACAAAGGATTCC    | TCTCCACAAGACCACTTC   | <i>Copia</i> | Lachesis_group5:81371650-81374387   |
| Ma_LTR_56 | repeat_TE0557485 | IRAP | CGTGGGTAGTAATGACAGT   | GGTCCAACTTGAGCATAAC  | <i>Copia</i> | Lachesis_group5:81371650-81374387   |
| Ma_LTR_57 | repeat_TE0557575 | RBIP | CATCAATGGGCTGACATC    | CGTGGGTTTATTAGTGGGA  | <i>Copia</i> | Lachesis_group5:81406495-81410802   |
| Ma_LTR_58 | repeat_TE0557793 | RBIP | GTTCAGAAGGGAGTTATGG   | GCCCAACAGTTATTACCC   | <i>Copia</i> | Lachesis_group5:81530745-81536867   |
| Ma_LTR_59 | repeat_TE0557810 | RBIP | AGGACAGAAGCAACCTGA    | CCAGAAGCAACACAATCTC  | <i>Copia</i> | Lachesis_group5:81564745-81566738   |
| Ma_LTR_60 | repeat_TE0634399 | RBIP | GGGACAACCTACATAACTTGG | GCTGCCACTAAATCAGAG   | <i>Copia</i> | Lachesis_group5:124483234-124486904 |
| Ma_LTR_61 | repeat_TE0634400 | RBIP | GAAGGAGACAATCCAGGA    | GCTGCCACTAAATCAGAG   | <i>Copia</i> | Lachesis_group5:124483977-124490204 |
| Ma_LTR_62 | repeat_TE0634400 | IRAP | ATTTAGTGGCAGCCCTTC    | GACCTTTCTTCCGCATC    | <i>Copia</i> | Lachesis_group5:124483977-124490204 |
| Ma_LTR_63 | repeat_TE0652500 | RBIP | GATGAAGATGTCAATGCGAC  | GGCAATGTGGATACGAGA   | <i>Copia</i> | Lachesis_group5:132351735-132353229 |
| Ma_LTR_64 | repeat_TE0652501 | RBIP | GATGAAGATGTCAATGCGAC  | GGCAATGTGGATACGAGA   | <i>Copia</i> | Lachesis_group5:132351946-132355938 |
| Ma_LTR_65 | repeat_TE0652501 | IRAP | AATGATGCTCGCCACTAC    | GTGAGGTATGTTCCCGAA   | <i>Copia</i> | Lachesis_group5:132351946-132355938 |
| Ma_LTR_66 | repeat_TE0652756 | RBIP | CAATCTCCACCTTGACTC    | TGGCTCTATCTACCACTCA  | <i>Copia</i> | Lachesis_group6:15781-17997         |
| Ma_LTR_67 | repeat_TE0652758 | RBIP | GACAACTTGAACGGACAAAC  | AGGGTAAAGGCTAAGGGAG  | <i>Copia</i> | Lachesis_group6:17998-20199         |
| Ma_LTR_68 | repeat_TE0653117 | RBIP | GGGACAACCTACATAACTTGG | GCTGCCACTAAATCAGAG   | <i>Copia</i> | Lachesis_group6:185622-192348       |
| Ma_LTR_69 | repeat_TE0652809 | RBIP | TCACTTACCTATTGCTCTCC  | TGCTTCCTTGACAGTCTTAG | <i>Copia</i> | Lachesis_group6:51419-53605         |
| Ma_LTR_70 | repeat_TE0652869 | RBIP | GCACATAAGATGGACACC    | CTCTAACTGAAAGGGCAAG  | <i>Copia</i> | Lachesis_group6:75607-76233         |
| Ma_LTR_71 | repeat_TE0711137 | RBIP | GCAGACATACGGTAAGGT    | TAAGGGTTCCGGTGACTAC  | <i>Copia</i> | Lachesis_group6:31344216-31348042   |

|           |                  |      |                        |                      |              |                                   |
|-----------|------------------|------|------------------------|----------------------|--------------|-----------------------------------|
| Ma_LTR_72 | repeat_TE0711177 | RBIP | GGCATCAGAGCAAGTTATG    | GTTGTAGGAATGAATGGACC | <i>Copia</i> | Lachesis_group6:31372611-31375702 |
| Ma_LTR_73 | repeat_TE0711226 | RBIP | GCTTCTTGGTTGACTCAG     | GACAATACTGCTGCCATC   | <i>Copia</i> | Lachesis_group6:31442137-31443294 |
| Ma_LTR_74 | repeat_TE0723322 | RBIP | TTCATACCACTCCGAGAG     | GGATGTCCATTAGAGGCT   | <i>Copia</i> | Lachesis_group6:40405125-40410808 |
| Ma_LTR_75 | repeat_TE0723332 | RBIP | TTCCACTCAGAAGCAAGC     | TTGTCAGTTCCTGGGAGAG  | <i>Copia</i> | Lachesis_group6:40414809-40421702 |
| Ma_LTR_76 | repeat_TE0723336 | RBIP | TGTGTGTGTGTGTCTGTTCT   | AACCTCGTAGTTCGGGTA   | <i>Copia</i> | Lachesis_group6:40422912-40426002 |
| Ma_LTR_77 | repeat_TE0723763 | IRAP | GTTGTCCAGCAGAGGTAAA    | CCCATACATTATTCACCGAC | <i>Copia</i> | Lachesis_group6:40607978-40615096 |
| Ma_LTR_78 | repeat_TE0723763 | RBIP | CATCCTGAATAGAGTCCCT    | ATCGGTATCCCTTAGCAC   | <i>Copia</i> | Lachesis_group6:40607978-40615096 |
| Ma_LTR_79 | repeat_TE0726001 | RBIP | GTCTTGAATAGTGTGAGCC    | TGAAGGGAGTCAGGTCTA   | <i>Copia</i> | Lachesis_group6:42034875-42040993 |
| Ma_LTR_80 | repeat_TE0726002 | RBIP | GAAGTCCCATTTCATCTGC    | AACTCATCCAGTGCCTTG   | <i>Copia</i> | Lachesis_group6:42040994-42042759 |
| Ma_LTR_81 | repeat_TE0726019 | RBIP | TCTTTAGACCTGACTCCCT    | CACATCTCGCCTTACTACA  | <i>Copia</i> | Lachesis_group6:42048081-42055965 |
| Ma_LTR_82 | repeat_TE0726019 | RBIP | CTCACCTGTATCTTTGCC     | GTGTAATGGAGAAGGACG   | <i>Copia</i> | Lachesis_group6:42048081-42055965 |
| Ma_LTR_83 | repeat_TE0726155 | RBIP | CTGTAGTATTCAAGGGTGG    | GAAGCCATTCTAAGGGTC   | <i>Copia</i> | Lachesis_group6:42120797-42128815 |
| Ma_LTR_84 | repeat_TE0726166 | RBIP | CCCAGAGTTTGAACCATAG    | GCAGAAGCAGAATACATCTC | <i>Copia</i> | Lachesis_group6:42136410-42139831 |
| Ma_LTR_85 | repeat_TE0754326 | RBIP | GGGTTGTGGAAGGTAAAG     | CCTATGTGCCAAGGACTT   | <i>Copia</i> | Lachesis_group0:7173588-7176491   |
| Ma_LTR_86 | repeat_TE0754326 | IRAP | TGAAGCAACAACCTCTACTCC  | ATCCTCTACATCATCCGC   | <i>Copia</i> | Lachesis_group0:7173588-7176491   |
| Ma_LTR_87 | repeat_TE0754487 | RBIP | ATAGAGGCTGAACACGCT     | ATCGGAAGAGAATCTGGC   | <i>Copia</i> | Lachesis_group0:7225114-7229272   |
| Ma_LTR_88 | repeat_TE0754488 | RBIP | AGTATCCCGAGTCCAAGAC    | CAAGATGAAGATGTGAGCAC | <i>Copia</i> | Lachesis_group0:7226013-7230587   |
| Ma_LTR_89 | repeat_TE0755070 | RBIP | CTGTAACCTTCAACTACCAGTC | CCACGAAACCAGTCATCTA  | <i>Copia</i> | Lachesis_group0:7430142-7431963   |

|            |                  |       |                       |                       |              |                                   |
|------------|------------------|-------|-----------------------|-----------------------|--------------|-----------------------------------|
| Ma_LTR_90  | repeat_TE0755797 | RBIP  | CAGTTTGACGAACGCTCTA   | CAATAGGATGGGACTAATGC  | <i>Copia</i> | Lachesis_group0:7649419-7655630   |
| Ma_LTR_91  | repeat_TE0764449 | RBIP  | GGACCAATGTCAACGAAAG   | ACTGGAACAAAGGCAAGC    | <i>Copia</i> | Lachesis_group0:11289587-11293702 |
| Ma_LTR_92  | repeat_TE0764449 | IRAP  | TGAGGGACCAATGTCAAC    | GAGCAAAGGTTATCACGAC   | <i>Copia</i> | Lachesis_group0:11289587-11293702 |
| Ma_LTR_93  | repeat_TE0764465 | RBIP  | CTCCTTGA CTGTTGCCATTA | GGGAAGAAACCCTGGATT    | <i>Copia</i> | Lachesis_group0:11302117-11303365 |
| Ma_LTR_94  | repeat_TE0764552 | RBIP  | GTTGGCTTTATCTACCACTC  | CAATCTCCACCTTGACTC    | <i>Copia</i> | Lachesis_group0:11330898-11333322 |
| Ma_LTR_95  | repeat_TE0765051 | RBIP  | CCTGAAGAAGAATGGTCC    | GTGGTAAGAAGTTGAAGCC   | <i>Copia</i> | Lachesis_group0:11547290-11547955 |
| Ma_LTR_96  | repeat_TE0785042 | RBIP  | GATGACAAAGAGCCTGAC    | GAGTTTCTGGATGAGCAG    | <i>Copia</i> | Lachesis_group0:20534578-20541377 |
| Ma_LTR_97  | repeat_TE0785043 | RBIP  | AGAGACTATGTT CAGAAGGG | CTTTCCCACTTATGGACAC   | <i>Copia</i> | Lachesis_group0:20538853-20544590 |
| Ma_LTR_98  | repeat_TE0785081 | RBIP  | GGTTTGACA ACTGGGCTA   | CAACACAACAACAGATGAGC  | <i>Copia</i> | Lachesis_group0:20560489-20565285 |
| Ma_LTR_99  | repeat_TE0785081 | RBIP  | ATGTGAGAAGTGGCTCCA    | AACTACTACAACGGCGGA    | <i>Copia</i> | Lachesis_group0:20560489-20565285 |
| Ma_LTR_100 | repeat_TE0785428 | RBIP  | TGCCTCTCTACATAACAAG   | GCTACCCAAGTGACAAGAA   | <i>Copia</i> | Lachesis_group0:20669192-20670287 |
| Ma_LTR_101 | repeat_TE0785465 | RBIP  | GCCTAAGTCCCTTGGTTTA   | TGTTATGCTGCCGCTACT    | <i>Copia</i> | Lachesis_group0:20679015-20685786 |
| Ma_LTR_102 | repeat_TE0785482 | RBIP  | AAGAGGAAGAAGTGAGCAC   | ATAAGAGCATCCCGAGTC    | <i>Copia</i> | Lachesis_group0:20691015-20696606 |
| Ma_LTR_103 | repeat_TE0785694 | RBIP  | CCAGTCAAATGGAGACCTA   | GCTCTTCTTTCTTAGCACC   | <i>Copia</i> | Lachesis_group0:20765871-20769425 |
| Ma_LTR_104 | repeat_TE0785696 | IRAP  | GGATGACCATAAAGTCGG    | CCTGTAGGTTCTCGTAACG   | <i>Copia</i> | Lachesis_group0:20769422-20770889 |
| Ma_LTR_105 | repeat_TE0785723 | RBIP  | TCTCAACTCCAATGGCAG    | TTCAGAGGCAGAAGCATC    | <i>Copia</i> | Lachesis_group0:20804730-20809941 |
| Ma_LTR_106 | repeat_TE1457294 | REMAP | CGGTATTCACATAACTCCCT  | TCCTCGGTAGGTAATCCA    | <i>Copia</i> | Lachesis_group1:125707-127979     |
| Ma_LTR_107 | repeat_TE1457489 | RBIP  | CACACTCATCACTGCCTA    | AGACTATGTT CAGAAGGGAG | <i>Copia</i> | Lachesis_group1:179017-185339     |

|            |                  |      |                      |                      |              |                                   |
|------------|------------------|------|----------------------|----------------------|--------------|-----------------------------------|
| Ma_LTR_108 | repeat_TE1457494 | RBIP | GCTTTGTCCTTCCTTGTAGA | ACCTGAGAGTTCATCTGTCC | <i>Copia</i> | Lachesis_group1:203179-208199     |
| Ma_LTR_109 | repeat_TE1457502 | IRAP | GGTCTTGATAAGTTGAAGGC | GGACACAGAGGAAATAGCA  | <i>Copia</i> | Lachesis_group1:212363-215374     |
| Ma_LTR_110 | repeat_TE1457502 | IRAP | CCCATTGACACACCTATG   | TTCTCTTCCTGGATACC    | <i>Copia</i> | Lachesis_group1:212363-215374     |
| Ma_LTR_111 | repeat_TE1457588 | RBIP | CCCACTAACCAAGCACAT   | GACAGGAAATCAACTTCTGG | <i>Copia</i> | Lachesis_group1:235096-239160     |
| Ma_LTR_112 | repeat_TE1457588 | RBIP | ATACTCTCCACCACGGTCA  | TGTTACCTTGTCATCCG    | <i>Copia</i> | Lachesis_group1:235096-239160     |
| Ma_LTR_113 | repeat_TE1482138 | RBIP | TGCTTCCAGTCTTGCTAC   | GCACAACTTGATGTCCTC   | <i>Copia</i> | Lachesis_group1:14199634-14206773 |
| Ma_LTR_114 | repeat_TE1482256 | RBIP | AGAGAGACTGCCTGTTACA  | GGAGGATAGAAGTGTGACA  | <i>Copia</i> | Lachesis_group1:14320335-14322364 |
| Ma_LTR_115 | repeat_TE1482257 | RBIP | CAAGCAGCAAGAGAGGTT   | AGGAAGCCAAAGGTTAGC   | <i>Copia</i> | Lachesis_group1:14321555-14327337 |
| Ma_LTR_116 | repeat_TE1482258 | RBIP | CCTCCCAAAGAGAGAGAGT  | TACGGTGTGTGTGAAAGC   | <i>Copia</i> | Lachesis_group1:14327340-14328598 |
| Ma_LTR_117 | repeat_TE1513724 | RBIP | AGATGTTGTCTGTGGAGC   | CTGGGAGAAGAGAACTCA   | <i>Copia</i> | Lachesis_group1:34602168-34602951 |
| Ma_LTR_118 | repeat_TE1513829 | RBIP | CATTCACTCCATTTGTGG   | GTCCATACTTCTCCCATTTG | <i>Copia</i> | Lachesis_group1:34693263-34695817 |
| Ma_LTR_119 | repeat_TE1528954 | RBIP | TCAATGTGAAGCCACTCC   | ATGTTCCAAACCCTGAGC   | <i>Copia</i> | Lachesis_group1:44915054-44923260 |
| Ma_LTR_120 | repeat_TE1529254 | IRAP | GGAAATGGAGGATGACCA   | GACGATTGAAGTTGCTAAGG | <i>Copia</i> | Lachesis_group1:45046506-45048235 |
| Ma_LTR_121 | repeat_TE1529335 | RBIP | CCAACCTAAATGACTGGAG  | CACACTCAATCTTTCAGGG  | <i>Copia</i> | Lachesis_group1:45085559-45088781 |
| Ma_LTR_122 | repeat_TE1529380 | RBIP | AGGCTTAGAGAGAGATGGG  | GACATTCTTGACTTGGG    | <i>Copia</i> | Lachesis_group1:45132620-45137757 |
| Ma_LTR_123 | repeat_TE1529380 | RBIP | AGTTCCTACGGCTAATGC   | GCGGTAAGACTGGAGATT   | <i>Copia</i> | Lachesis_group1:45132620-45137757 |
| Ma_LTR_124 | repeat_TE1529403 | IRAP | CCCAAGTCACAAGAATGTC  | ACAGGAGAGATGTCTAAGGG | <i>Copia</i> | Lachesis_group1:45147393-45151384 |
| Ma_LTR_125 | repeat_TE1697693 | RBIP | CACAGTCCCAGTGATTAC   | GAGAGAGATTGAAGCCAC   | <i>Copia</i> | Lachesis_group2:1009621-1010361   |

|            |                  |      |                       |                        |              |                                   |
|------------|------------------|------|-----------------------|------------------------|--------------|-----------------------------------|
| Ma_LTR_126 | repeat_TE1697693 | IRAP | CAAACAATCACAGTCCCAGT  | TTCCAACATCTGAGAGCG     | <i>Copia</i> | Lachesis_group2:1009621-1010361   |
| Ma_LTR_127 | repeat_TE1697941 | RBIP | TAAAGTCGCCACCGAAGT    | GGTCCCCGTTGGATACAA     | <i>Copia</i> | Lachesis_group2:1076677-1077292   |
| Ma_LTR_128 | repeat_TE1697944 | RBIP | CACAAACTCCACCACCAA    | GAAATCCGAGGAATCTTGAC   | <i>Copia</i> | Lachesis_group2:1094908-1095610   |
| Ma_LTR_129 | repeat_TE1697945 | IRAP | CATCTTTACCTTCCACAACC  | GGTGAACAATCTCTTGGTG    | <i>Copia</i> | Lachesis_group2:1094992-1096797   |
| Ma_LTR_130 | repeat_TE1698337 | RBIP | CTCCCACTTCTTCTTTATG   | GTTCACTACTTTCTCTACT    | <i>Copia</i> | Lachesis_group2:1233831-1236424   |
| Ma_LTR_131 | repeat_TE1699394 | IRAP | AAGTGGTGAACCTTAGGC    | GATGTCCCATTTAGAACCC    | <i>Copia</i> | Lachesis_group2:1652124-1655724   |
| Ma_LTR_132 | repeat_TE1699394 | RBIP | GTGGGAAACTTGGATTGG    | CAAACCTTACTCGGTTGCC    | <i>Copia</i> | Lachesis_group2:1652124-1655724   |
| Ma_LTR_133 | repeat_TE1699395 | ISBP | AAGGATGGTAGAGAGCAGC   | TTCACCTACCCAAACCCT     | <i>Copia</i> | Lachesis_group2:1655725-1657732   |
| Ma_LTR_134 | repeat_TE1699603 | RBIP | GATGTCCCATTTAGAACCC   | CTACCTTATTGCTCCACAC    | <i>Copia</i> | Lachesis_group2:1717345-1722264   |
| Ma_LTR_135 | repeat_TE1699603 | IRAP | CTCCGAGACATAGCACAA    | GGAAAGTGGTGAACCTTAG    | <i>Copia</i> | Lachesis_group2:1717345-1722264   |
| Ma_LTR_136 | repeat_TE1699697 | IRAP | CCCACCTTGAACCTATGG    | TCTTCTCTCTCTCTCGCTG    | <i>Copia</i> | Lachesis_group2:1751319-1754074   |
| Ma_LTR_137 | repeat_TE1697674 | RBIP | CAGTCTGAGCAACCTTCA    | CTTCATCATCTTCTGAGC     | <i>Copia</i> | Lachesis_group2:990918-992537     |
| Ma_LTR_138 | repeat_TE1697674 | IRAP | GCATTGTTGTCACAGTCAAG  | GCAAGTTACTCTTCATACCTGG | <i>Copia</i> | Lachesis_group2:990918-992537     |
| Ma_LTR_139 | repeat_TE1794557 | RBIP | GATGACGATGATGCTCTG    | GTGATTTGGCAGGCTTAC     | <i>Copia</i> | Lachesis_group2:49005367-49006617 |
| Ma_LTR_140 | repeat_TE1794673 | ISBP | ACTCTACTTATCCGCTGC    | TCTCCTGTTTCTGACGAC     | <i>Copia</i> | Lachesis_group2:49060974-49069094 |
| Ma_LTR_141 | repeat_TE1794746 | IRAP | TCAATCACACACCCAGTG    | TTCCAACATCTGAGAGCG     | <i>Copia</i> | Lachesis_group2:49108815-49111119 |
| Ma_LTR_142 | repeat_TE1794746 | RBIP | CAGTCTCCTTCTTCTCAGA   | CTCCATAGCAGAGCAAAG     | <i>Copia</i> | Lachesis_group2:49108815-49111119 |
| Ma_LTR_143 | repeat_TE1794755 | RBIP | GCTGGTCCTCTAACTAATAGC | TGTGTTGGTCTAATAGCCC    | <i>Copia</i> | Lachesis_group2:49129093-49133810 |



|            |                  |      |                      |                        |              |                                   |
|------------|------------------|------|----------------------|------------------------|--------------|-----------------------------------|
| Ma_LTR_144 | repeat_TE1794755 | IRAP | TCACCCAAATACAGGCAG   | TGTGGTTAGCACCGAACT     | <i>Copia</i> | Lachesis_group2:49129093-49133810 |
| Ma_LTR_145 | repeat_TE1794841 | RBIP | GGTTACTTAGGCTCCAAGG  | TCCTCAACAATCACCACC     | <i>Copia</i> | Lachesis_group2:49200841-49202109 |
| Ma_LTR_146 | repeat_TE1794845 | RBIP | ATCCCTTCTCTCCTTCCCT  | TCACCTTGATACTTGCCG     | <i>Copia</i> | Lachesis_group2:49204334-49205543 |
| Ma_LTR_147 | repeat_TE1794847 | RBIP | GGTCTTCCTTTGCCTTTC   | CCAAGTGGGAGAATGTTAGA   | <i>Copia</i> | Lachesis_group2:49205645-49208811 |
| Ma_LTR_148 | repeat_TE1794858 | IRAP | GGTGTGGACAGATAGTAAGG | GAGTTGGTAGGTTGAGTTTG   | <i>Copia</i> | Lachesis_group2:49223605-49224355 |
| Ma_LTR_149 | repeat_TE1794869 | RBIP | CTAAATGGAGGGAAGAGAGA | GTGACAACTTGAGTGCCA     | <i>Copia</i> | Lachesis_group2:49227788-49229084 |
| Ma_LTR_150 | repeat_TE1795116 | IRAP | GTCTTCCTCTTGCTTGGT   | CGTCTATGTGGAGTAGTGG    | <i>Copia</i> | Lachesis_group2:49380129-49381198 |
| Ma_LTR_151 | repeat_TE0000009 | RBIP | CGTTTGAGTG TAGTATCGC | GTTGGTTCTTCTTGGGAG     | <i>Gypsy</i> | Lachesis_group3:19917-24062       |
| Ma_LTR_152 | repeat_TE0000009 | IRAP | CTTATCTCCCTCAACAAGC  | CTACAGAAATGGCGACTTC    | <i>Gypsy</i> | Lachesis_group3:19917-24062       |
| Ma_LTR_153 | repeat_TE0000009 | IRAP | CAGCAACATAACGAGAACG  | CCGAGAGAAATGAGAGAGAAGT | <i>Gypsy</i> | Lachesis_group3:19917-24062       |
| Ma_LTR_154 | repeat_TE0001566 | RBIP | AGTAGGAACGAAACCAGG   | CGTCTAAGTAAATGTGGGC    | <i>Gypsy</i> | Lachesis_group3:651630-664788     |
| Ma_LTR_155 | repeat_TE0031021 | RBIP | CTTGTTGCGTTAGTGTGC   | AACTGGGATGGTCCGTAT     | <i>Gypsy</i> | Lachesis_group3:12891314-12896300 |
| Ma_LTR_156 | repeat_TE0031115 | RBIP | CATCAGAGTTCAAACGGAG  | CGCTGGAGAAACCTATCA     | <i>Gypsy</i> | Lachesis_group3:12932702-12947235 |
| Ma_LTR_157 | repeat_TE0031851 | RBIP | CAAATACTGACTTGAGCGTC | GCGAGTGCTTTCTATGTC     | <i>Gypsy</i> | Lachesis_group3:13269649-13272661 |
| Ma_LTR_158 | repeat_TE0048402 | RBIP | GCGTAAGAACAACGAACG   | TAAAGGAGGGTGCGGATA     | <i>Gypsy</i> | Lachesis_group3:21142721-21145165 |
| Ma_LTR_159 | repeat_TE0048405 | RBIP | CATTCTCTTCTCCTTCACTC | AGACCTCTCTTGCTCCTAC    | <i>Gypsy</i> | Lachesis_group3:21144264-21145453 |
| Ma_LTR_160 | repeat_TE0048412 | RBIP | GAAGAAGAAGGTGTGTGG   | GGTGAGGTGTGAATAGCA     | <i>Gypsy</i> | Lachesis_group3:21146984-21149604 |
| Ma_LTR_161 | repeat_TE0048414 | IRAP | TTCATCTCTCCTCTCACTGT | CTTTCTTCCTTACATACGGG   | <i>Gypsy</i> | Lachesis_group3:21147925-21154430 |

|            |                  |      |                      |                      |              |                                     |
|------------|------------------|------|----------------------|----------------------|--------------|-------------------------------------|
| Ma_LTR_162 | repeat_TE0048415 | RBIP | TAGGGCATCCCGATAGAT   | GCTCAAAGAGAAATAGCAGG | <i>Gypsy</i> | Lachesis_group3:21151979-21156511   |
| Ma_LTR_163 | repeat_TE0048415 | RBIP | TTAGGACAATCCCGATGG   | TGGAAGATGACTGCCTCA   | <i>Gypsy</i> | Lachesis_group3:21151979-21156511   |
| Ma_LTR_164 | repeat_TE0048641 | RBIP | TGGAAGATGACTGCCTCA   | TTAGGACAATCCCGATGG   | <i>Gypsy</i> | Lachesis_group3:21236649-21241845   |
| Ma_LTR_165 | repeat_TE0079303 | RBIP | TTCCTTCCGACTCATCCT   | CCTCAAGCAAACATCATACC | <i>Gypsy</i> | Lachesis_group3:38253144-38256025   |
| Ma_LTR_166 | repeat_TE0079303 | RBIP | CAGGACCAATGAGTCACT   | AAGAGTTCGTCTCCACAG   | <i>Gypsy</i> | Lachesis_group3:38253144-38256025   |
| Ma_LTR_167 | repeat_TE0079307 | RBIP | CTTTGACGAAC TTGAACCC | CCACAGGGATTGTTTGGT   | <i>Gypsy</i> | Lachesis_group3:38256122-38257578   |
| Ma_LTR_168 | repeat_TE0079334 | RBIP | GGGTTATTGAACTTCTCCG  | GATTGCCCTATGTCTCTTCT | <i>Gypsy</i> | Lachesis_group3:38262675-38266186   |
| Ma_LTR_169 | repeat_TE0079334 | IRAP | GTGAATGTGTGTGTGTC    | CTTTGAGCAAGTGTGTAGGT | <i>Gypsy</i> | Lachesis_group3:38262675-38266186   |
| Ma_LTR_170 | repeat_TE0079399 | RBIP | GTGACGAGAAGAAGAAAGG  | CACAGATTTACCACTGGC   | <i>Gypsy</i> | Lachesis_group3:38317704-38318286   |
| Ma_LTR_171 | repeat_TE0079524 | RBIP | GAATGAGGGTTTCAGAGAGA | ATGCTTGGCAGTTACGAC   | <i>Gypsy</i> | Lachesis_group3:38365465-38366316   |
| Ma_LTR_172 | repeat_TE0079534 | RBIP | GGTCGGCATTCTTCCTTA   | ACACTTCACAGGGACATCG  | <i>Gypsy</i> | Lachesis_group3:38381575-38382079   |
| Ma_LTR_173 | repeat_TE0079534 | RBIP | GGGAAGTCTCCAAGTTATC  | TACGGGCACAATACTGAG   | <i>Gypsy</i> | Lachesis_group3:38381575-38382079   |
| Ma_LTR_174 | repeat_TE0208480 | RBIP | CAATGATGAGGAGATGAGAC | TCCAACAAGATAGCCAGG   | <i>Gypsy</i> | Lachesis_group3:116395013-116397873 |
| Ma_LTR_175 | repeat_TE0208836 | RBIP | CTAATGGTGTGATGGTGG   | GAGAGAGGTTGGAGAGATG  | <i>Gypsy</i> | Lachesis_group3:116541487-116543562 |
| Ma_LTR_176 | repeat_TE0208838 | RBIP | GCCTTTATCTGTGGAACAC  | GGTCTCATCAGTTTACCAAC | <i>Gypsy</i> | Lachesis_group3:116544208-116546809 |
| Ma_LTR_177 | repeat_TE0208838 | IRAP | CGGATGCCTTTATCTGTG   | CAAGCGGTCAAGTTCTCA   | <i>Gypsy</i> | Lachesis_group3:116544208-116546809 |
| Ma_LTR_178 | repeat_TE0208839 | IRAP | TCGCAACCAACTACACTG   | CAAGACCACTCGCATCTA   | <i>Gypsy</i> | Lachesis_group3:116546810-116554275 |
| Ma_LTR_179 | repeat_TE0209022 | RBIP | CCAAAGGCTGTCTGTTAC   | GGCTCTATGTTCTGTCTCT  | <i>Gypsy</i> | Lachesis_group4:12773-14933         |

|            |                  |      |                     |                       |              |                                   |
|------------|------------------|------|---------------------|-----------------------|--------------|-----------------------------------|
| Ma_LTR_180 | repeat_TE0209023 | RBIP | CCAAAGGCTGTCTGTTAC  | GGCTCTATGTTCTTGTCTCT  | <i>Gypsy</i> | Lachesis_group4:13022-15688       |
| Ma_LTR_181 | repeat_TE0209462 | RBIP | CAAATCTTGGCACTAAGGC | GTTGTCGCATTGTTGGTC    | <i>Gypsy</i> | Lachesis_group4:214124-216154     |
| Ma_LTR_182 | repeat_TE0209462 | RBIP | CCTCTTCACATTCATCACC | TCACCATAACCAGGTAAGG   | <i>Gypsy</i> | Lachesis_group4:214124-216154     |
| Ma_LTR_183 | repeat_TE0210498 | RBIP | TTACTAATCCCACCACCC  | GACGAAGGAGAAGAGAATG   | <i>Gypsy</i> | Lachesis_group4:628949-631895     |
| Ma_LTR_184 | repeat_TE0210501 | RBIP | TTACTAATCCCACCACCC  | AGAAGAGACGAAGGAGAAG   | <i>Gypsy</i> | Lachesis_group4:643630-648275     |
| Ma_LTR_185 | repeat_TE0210809 | RBIP | AGGCTTGGCTTGATAGGA  | CTGAAGACTTTGGAATCGC   | <i>Gypsy</i> | Lachesis_group4:748045-749404     |
| Ma_LTR_186 | repeat_TE0210809 | IRAP | TAGGCTTGGCTTGATAGG  | GCTTCTCTGTTGCTGTGA    | <i>Gypsy</i> | Lachesis_group4:748045-749404     |
| Ma_LTR_187 | repeat_TE0210829 | IRAP | TGCTACAGACCAAGGGTA  | GAGGAAGTTGAAACGGAC    | <i>Gypsy</i> | Lachesis_group4:753364-754091     |
| Ma_LTR_188 | repeat_TE0210830 | RBIP | AAGGAGGAGAAGAGGAAC  | CATACCAGAATACACAGGG   | <i>Gypsy</i> | Lachesis_group4:754092-755093     |
| Ma_LTR_189 | repeat_TE0293613 | RBIP | CATTCACTCTCGCTTC    | GTTGTTTAGAACCCGACC    | <i>Gypsy</i> | Lachesis_group4:40694816-40696583 |
| Ma_LTR_190 | repeat_TE0293614 | RBIP | CACCACCTTTACCACACA  | CACAGGGAACAAATCTGG    | <i>Gypsy</i> | Lachesis_group4:40696584-40699040 |
| Ma_LTR_191 | repeat_TE0293615 | RBIP | GGTGTGAATACCTTCCCT  | CTAACCTACGAACATCTTGC  | <i>Gypsy</i> | Lachesis_group4:40698517-40699202 |
| Ma_LTR_192 | repeat_TE0293622 | RBIP | TTGTATCCAACGGGAACC  | GCCAAGTGTGTTGTCTTCG   | <i>Gypsy</i> | Lachesis_group4:40700315-40701035 |
| Ma_LTR_193 | repeat_TE0293630 | RBIP | GAAGAGACAAAGAGCAAGG | CCAACCAGTGAAAGTAGATTG | <i>Gypsy</i> | Lachesis_group4:40706342-40707335 |
| Ma_LTR_194 | repeat_TE0293630 | IRAP | GAGGGAAAGAAGAGGCATA | CTAACCAATGAACAACTGGC  | <i>Gypsy</i> | Lachesis_group4:40706342-40707335 |
| Ma_LTR_195 | repeat_TE0293631 | IRAP | AACTGACCGCTTGCTAAGT | GCGAAGTGGCTTGATCTT    | <i>Gypsy</i> | Lachesis_group4:40706692-40708386 |
| Ma_LTR_196 | repeat_TE0293772 | RBIP | GATTGTTCCGATTCAGGC  | AGGACTTGCTGGATTG      | <i>Gypsy</i> | Lachesis_group4:40777220-40777952 |
| Ma_LTR_197 | repeat_TE0293852 | RBIP | GCCCTAAACACAAACCCT  | TGCCTCACAAGGATACG     | <i>Gypsy</i> | Lachesis_group4:40804535-40805265 |

|            |                  |      |                       |                      |              |                                   |
|------------|------------------|------|-----------------------|----------------------|--------------|-----------------------------------|
| Ma_LTR_198 | repeat_TE0294522 | IRAP | GACTCGGGATTGTTGGTT    | AGGTCTTGGGATTGTTGG   | <i>Gypsy</i> | Lachesis_group4:41068815-41069501 |
| Ma_LTR_199 | repeat_TE0294526 | RBIP | GTCTCCTCCAAGGCTAAA    | GGTTCGCACTAAGTTTCC   | <i>Gypsy</i> | Lachesis_group4:41081302-41083445 |
| Ma_LTR_200 | repeat_TE0294526 | IRAP | GTCTCCTCCAAGGCTAAA    | GTCTTTGAGCAAGTGTGC   | <i>Gypsy</i> | Lachesis_group4:41081302-41083445 |
| Ma_LTR_201 | repeat_TE0294527 | RBIP | AACAAGGTAAGGGTGGGA    | TTCACTTTGGGAGGCTGT   | <i>Gypsy</i> | Lachesis_group4:41083421-41087793 |
| Ma_LTR_202 | repeat_TE0294871 | IRAP | AACATTGTCGGTCTCCTG    | GTAAATCACTCGCTTCTACG | <i>Gypsy</i> | Lachesis_group4:41180799-41186325 |
| Ma_LTR_203 | repeat_TE0295297 | RBIP | AGAGGTTGAAAGAGGTGTC   | GAGGTGTGAATAGCAGAAC  | <i>Gypsy</i> | Lachesis_group4:41370987-41373481 |
| Ma_LTR_204 | repeat_TE0295305 | RBIP | TGTTCTGGCTATGAGACAGC  | CATTGAGAGTGGGATTTCGT | <i>Gypsy</i> | Lachesis_group4:41386362-41395100 |
| Ma_LTR_205 | repeat_TE0295307 | RBIP | AAAGTAGGCTCAAGAGGG    | CCTGTTCCGATGTAGTTAC  | <i>Gypsy</i> | Lachesis_group4:41394690-41400203 |
| Ma_LTR_206 | repeat_TE0353401 | RBIP | GTCTTCTACTCTCCAATTCTC | GAGCACCACAAATCACAC   | <i>Gypsy</i> | Lachesis_group4:83582356-83583290 |
| Ma_LTR_207 | repeat_TE0353725 | RBIP | TCTGACACAATACTGGAAGG  | TGTTGATAGTTGGGTGG    | <i>Gypsy</i> | Lachesis_group4:83762377-83763840 |
| Ma_LTR_208 | repeat_TE0353726 | RBIP | CAACTCCTTCTCCTTCAAGA  | AGGGCTCTGATTAGGTGTC  | <i>Gypsy</i> | Lachesis_group4:83763841-83767896 |
| Ma_LTR_209 | repeat_TE0396587 | RBIP | GTCTCACACACAAGATTCC   | GGTGGTTAGGGAGGTTAT   | <i>Gypsy</i> | Lachesis_group5:170188-171008     |
| Ma_LTR_210 | repeat_TE0396588 | RBIP | GTCTCACACACAAGATTCC   | GGTGGTTAGGGAGGTTAT   | <i>Gypsy</i> | Lachesis_group5:170601-171654     |
| Ma_LTR_211 | repeat_TE0397116 | RBIP | GTTCTCTGAAAGGAGCCA    | TATCGTCCACAGGGAGTT   | <i>Gypsy</i> | Lachesis_group5:337823-339134     |
| Ma_LTR_212 | repeat_TE0396215 | RBIP | AGCCAAAGGTAAAGTCCC    | CACATAATGGTTGACCCG   | <i>Gypsy</i> | Lachesis_group5:3863-5697         |
| Ma_LTR_213 | repeat_TE0398079 | RBIP | AGAGAATCACCTTGTCCTC   | AACTTCCTCCTCACTCCA   | <i>Gypsy</i> | Lachesis_group5:752267-754252     |
| Ma_LTR_214 | repeat_TE0398081 | RBIP | CTGGAGTTTGGTGAAAGTC   | CCTTAGTTGGTAGTTAGCC  | <i>Gypsy</i> | Lachesis_group5:755969-756972     |
| Ma_LTR_215 | repeat_TE0398081 | IRAP | CGTCGTGACCATCAAATC    | AGGAACATACGCAAACCC   | <i>Gypsy</i> | Lachesis_group5:755969-756972     |

|            |                  |      |                       |                     |              |                                   |
|------------|------------------|------|-----------------------|---------------------|--------------|-----------------------------------|
| Ma_LTR_216 | repeat_TE0398129 | RBIP | TTCTCACCGAAGTCACCT    | CCGTTTGTGTTACCCTC   | <i>Gypsy</i> | Lachesis_group5:765548-769940     |
| Ma_LTR_217 | repeat_TE0398129 | RBIP | CATCGCACTTTGAGGATAC   | TAGCCAACACTACGCAAC  | <i>Gypsy</i> | Lachesis_group5:765548-769940     |
| Ma_LTR_218 | repeat_TE0398131 | RBIP | GAACCCGACTTTGATTGC    | AGGTGCCCAGAGTTATGAG | <i>Gypsy</i> | Lachesis_group5:767283-770416     |
| Ma_LTR_219 | repeat_TE0398142 | RBIP | CCCACGATTTCACTGACA    | TACTGGTTGAGACCCGCTA | <i>Gypsy</i> | Lachesis_group5:793474-801615     |
| Ma_LTR_220 | repeat_TE0398142 | IRAP | GAAGGAATCAAGGCAGGA    | CCCTCAAACCATAGCAATG | <i>Gypsy</i> | Lachesis_group5:793474-801615     |
| Ma_LTR_221 | repeat_TE0520551 | RBIP | TACAACGGATGTGAGGGA    | TTCAGTAAAGTCGCCACC  | <i>Gypsy</i> | Lachesis_group5:54917581-54919113 |
| Ma_LTR_222 | repeat_TE0520552 | IRAP | AAACCAGAGTCTCCGTGA    | CCAGGGATAACCTTCAAAC | <i>Gypsy</i> | Lachesis_group5:54919114-54922681 |
| Ma_LTR_223 | repeat_TE0520555 | RBIP | TGTCCCGTCCTCAGATACT   | CATCCCTCACATTCGTTG  | <i>Gypsy</i> | Lachesis_group5:54925592-54928054 |
| Ma_LTR_224 | repeat_TE0520572 | IRAP | GATAGGGTTGCTGTTGGT    | AGGTAGAGGAAAGTGGCA  | <i>Gypsy</i> | Lachesis_group5:54932938-54935564 |
| Ma_LTR_225 | repeat_TE0520601 | RBIP | GTCAACTTTTCAGAGAATGCC | GGTTTGGTCTTGTTCCCA  | <i>Gypsy</i> | Lachesis_group5:54953706-54956623 |
| Ma_LTR_226 | repeat_TE0520633 | RBIP | GCTTCAAGTGTGGTGGAT    | AACGCAACCCTTCTCTCT  | <i>Gypsy</i> | Lachesis_group5:54978052-54978722 |
| Ma_LTR_227 | repeat_TE0572157 | RBIP | AAGGAGATAGAGGTGGTGG   | GGTGGAATAGCAAGGTT   | <i>Gypsy</i> | Lachesis_group5:91970128-91971439 |
| Ma_LTR_228 | repeat_TE0572167 | IRAP | AGAGAAAGGAGAGGGAGA    | CATACGCACACACACTTC  | <i>Gypsy</i> | Lachesis_group5:91975239-91977241 |
| Ma_LTR_229 | repeat_TE0572169 | RBIP | ATCGGAATGGACTCTACC    | GTGTATGCGTATGTGTGAG | <i>Gypsy</i> | Lachesis_group5:91987718-91989737 |
| Ma_LTR_230 | repeat_TE0572170 | IRAP | AGAGAAAGGAGAGGGAGA    | CATACGCACACACACTTC  | <i>Gypsy</i> | Lachesis_group5:91989453-91991531 |
| Ma_LTR_231 | repeat_TE0572177 | RBIP | CTTGAGGAGACAAAGTTC    | CACAACATCTTGGCTCTG  | <i>Gypsy</i> | Lachesis_group5:92005013-92006908 |
| Ma_LTR_232 | repeat_TE0572178 | RBIP | CTTGAGGAGACAAAGTTC    | CACAACATCTTGGCTCTG  | <i>Gypsy</i> | Lachesis_group5:92005017-92007021 |
| Ma_LTR_233 | repeat_TE0572216 | RBIP | ATGTTAGTGGTCTCCAGC    | CGAGGATACAGAGGGATAG | <i>Gypsy</i> | Lachesis_group5:92016830-92020003 |

|            |                  |      |                       |                      |              |                                   |
|------------|------------------|------|-----------------------|----------------------|--------------|-----------------------------------|
| Ma_LTR_234 | repeat_TE0572229 | ISBP | AAGAGGTTCCCGTAGAGT    | GACACTTTGATTAGACCACC | <i>Gypsy</i> | Lachesis_group5:92025156-92029165 |
| Ma_LTR_235 | repeat_TE0572230 | IRAP | CACCCCTGTAAATCCCAG    | GATGTCTTGAGTTGGAGGT  | <i>Gypsy</i> | Lachesis_group5:92029153-92032415 |
| Ma_LTR_236 | repeat_TE0572232 | IRAP | CATCAGTCCACTTCCAGTC   | TGGGTGAGCAGACACTTA   | <i>Gypsy</i> | Lachesis_group5:92031268-92034351 |
| Ma_LTR_237 | repeat_TE0572233 | IRAP | CCCAGTGAAACTACATCATC  | TAATGCCCTTGGTCTCAG   | <i>Gypsy</i> | Lachesis_group5:92032692-92034311 |
| Ma_LTR_238 | repeat_TE0572235 | RBIP | TCTACCCAGAACTACGAGG   | GTGCTTCAACAGTGACCT   | <i>Gypsy</i> | Lachesis_group5:92035668-92036812 |
| Ma_LTR_239 | repeat_TE0572243 | RBIP | CCTGTGGGCTTGATTTAG    | CACCTCATCTCCAAACTACA | <i>Gypsy</i> | Lachesis_group5:92049696-92052924 |
| Ma_LTR_240 | repeat_TE0572244 | RBIP | GGTAAGATGTCGCCCTAT    | TTCAGCAGCAGTAAGTGG   | <i>Gypsy</i> | Lachesis_group5:92050152-92053260 |
| Ma_LTR_241 | repeat_TE0653017 | RBIP | GAAGAGAGAGAACCGAGAA   | TTGGGTAAAGAGAGTCCG   | <i>Gypsy</i> | Lachesis_group6:120046-122798     |
| Ma_LTR_242 | repeat_TE0653018 | IRAP | CAAAGCATCTGACATCCAC   | CAAACGCATCATCTCTCG   | <i>Gypsy</i> | Lachesis_group6:122410-127080     |
| Ma_LTR_243 | repeat_TE0653019 | RBIP | AAGAGTCAAACCTCACCC    | CTGTTGCTGATACCGTTG   | <i>Gypsy</i> | Lachesis_group6:122799-124535     |
| Ma_LTR_244 | repeat_TE0653019 | IRAP | ATCACTTCCAAGGGTCTG    | TAAGGAGGAGGGATTGTG   | <i>Gypsy</i> | Lachesis_group6:122799-124535     |
| Ma_LTR_245 | repeat_TE0653021 | IRAP | TTTACTTCTTGGGCGTCC    | CTTACAATGTTGCCTCG    | <i>Gypsy</i> | Lachesis_group6:127092-131425     |
| Ma_LTR_246 | repeat_TE0653023 | RBIP | AGTTTCACACACCAGTGG    | CGTCGTAGGAATCTAACAC  | <i>Gypsy</i> | Lachesis_group6:131433-132585     |
| Ma_LTR_247 | repeat_TE0653027 | RBIP | CACACACACCAAACCTGAAAC | CGGTTCTCTCTCTCTCTCA  | <i>Gypsy</i> | Lachesis_group6:133264-133984     |
| Ma_LTR_248 | repeat_TE0653140 | IRAP | TCCTCACTATCCTCATCGG   | TGGAAGAAAGAAGGGCTC   | <i>Gypsy</i> | Lachesis_group6:207926-217401     |
| Ma_LTR_249 | repeat_TE0653145 | IRAP | AGAGGAAGGTATTTCGCAC   | GTAGGAGCAAGAGAGGTCT  | <i>Gypsy</i> | Lachesis_group6:217624-218707     |
| Ma_LTR_250 | repeat_TE0653566 | IRAP | CCAACCAATAACACCCTC    | TAGGACAACAACCAAGTGC  | <i>Gypsy</i> | Lachesis_group6:370829-373866     |
| Ma_LTR_251 | repeat_TE0653570 | IRAP | CCTAAATGTTGGCTCCAGT   | GGTGACGATTCAAAGTGTC  | <i>Gypsy</i> | Lachesis_group6:374502-375356     |

|            |                  |      |                     |                      |              |                                   |
|------------|------------------|------|---------------------|----------------------|--------------|-----------------------------------|
| Ma_LTR_252 | repeat_TE0654071 | IRAP | CTTCCCAACTTCCAATCG  | TGTATTAGGATGGCACCG   | <i>Gypsy</i> | Lachesis_group6:529055-530061     |
| Ma_LTR_253 | repeat_TE0654088 | RBIP | TCACATCAGCAGTTACTCC | GGTTGTAGCCTGTCAAGTC  | <i>Gypsy</i> | Lachesis_group6:537620-539623     |
| Ma_LTR_254 | repeat_TE0654130 | RBIP | AGCGATTCTAAGACGACG  | GCTTGATGCTCTGATGGT   | <i>Gypsy</i> | Lachesis_group6:575905-581234     |
| Ma_LTR_255 | repeat_TE0654380 | RBIP | ACTTGCTATGACTGCTCCG | TTAGGACAATCCCGATGG   | <i>Gypsy</i> | Lachesis_group6:668547-674072     |
| Ma_LTR_256 | repeat_TE0687518 | IRAP | GAAGAGGAGAAGAATGGGT | GAGGGATTGTGATGCTAAAC | <i>Gypsy</i> | Lachesis_group6:17354756-17359902 |
| Ma_LTR_257 | repeat_TE0687518 | IRAP | GAGTCTTTGTTCCCTTCC  | CCCTGGGTTGAGATAGTT   | <i>Gypsy</i> | Lachesis_group6:17354756-17359902 |
| Ma_LTR_258 | repeat_TE0687519 | IRAP | GTCTTTGTTCCCTTCCTG  | CCTGGGTTGAGATAGTTG   | <i>Gypsy</i> | Lachesis_group6:17359140-17360013 |
| Ma_LTR_259 | repeat_TE0687549 | RBIP | AAGTCCCTGTGGATTCTC  | GTCCTATCATACACGCCA   | <i>Gypsy</i> | Lachesis_group6:17373512-17374604 |
| Ma_LTR_260 | repeat_TE0687586 | RBIP | GGGAGTGATGAGAGAGAA  | GTCAAAGAGTTTACTGGTCC | <i>Gypsy</i> | Lachesis_group6:17412646-17415088 |
| Ma_LTR_261 | repeat_TE0687600 | IRAP | AGGAATCTCACCCTTGG   | GTTTCACACACTTTCGGTC  | <i>Gypsy</i> | Lachesis_group6:17421098-17428157 |
| Ma_LTR_262 | repeat_TE0687601 | RBIP | GGTTAGAACTACGGCTTTG | TCCCTACAAGGATTGACC   | <i>Gypsy</i> | Lachesis_group6:17428158-17428944 |
| Ma_LTR_263 | repeat_TE0687965 | RBIP | TCTAAGGTAAGGGTGGGA  | CTCAACCAACCAACATCTG  | <i>Gypsy</i> | Lachesis_group6:17599056-17601064 |
| Ma_LTR_264 | repeat_TE0688011 | IRAP | AGGCTTGGCTTGATAGGA  | CTGAAGACTTTGGAATCGC  | <i>Gypsy</i> | Lachesis_group6:17614753-17616818 |
| Ma_LTR_265 | repeat_TE0688024 | RBIP | GACACAACAACCCGACT   | GGTCCTAACCTACCAAATG  | <i>Gypsy</i> | Lachesis_group6:17624889-17626891 |
| Ma_LTR_266 | repeat_TE0688144 | IRAP | TCGCACTTTGAGGATACG  | ATTCGGGAGTCGGTTATG   | <i>Gypsy</i> | Lachesis_group6:17734501-17736062 |
| Ma_LTR_267 | repeat_TE0688145 | IRAP | ACACCGAAGGACTTAGACC | CACGGACCAGAACTATG    | <i>Gypsy</i> | Lachesis_group6:17736063-17743643 |
| Ma_LTR_268 | repeat_TE0688148 | IRAP | TCGCACTTTGAGGATACG  | ATTCGGGAGTCGGTTATG   | <i>Gypsy</i> | Lachesis_group6:17743663-17744189 |
| Ma_LTR_269 | repeat_TE0688282 | RBIP | GAACTATTGTTGGACCACC | GGAICTAAGGACTCATCTAA | <i>Gypsy</i> | Lachesis_group6:17796688-17797272 |

|            |                  |      |                      |                     |              |                                   |
|------------|------------------|------|----------------------|---------------------|--------------|-----------------------------------|
| Ma_LTR_270 | repeat_TE0701835 | RBIP | TACTCAGGGCAGGAAGTTC  | GAAGAAGAGGAAGGCGAT  | <i>Gypsy</i> | Lachesis_group6:25680571-25682574 |
| Ma_LTR_271 | repeat_TE0701861 | RBIP | TCCGTAGGAACCTCTTTG   | TCCGCTTTGACTTGTGTC  | <i>Gypsy</i> | Lachesis_group6:25696778-25698842 |
| Ma_LTR_272 | repeat_TE0701862 | RBIP | CTGATTGGACTCTTGACAT  | ATTTCGGCAGGGAGGTAT  | <i>Gypsy</i> | Lachesis_group6:25698843-25699358 |
| Ma_LTR_273 | repeat_TE0737657 | IRAP | CTTCCCTTAGCGTAACCA   | GGACTTATCTCCCTCAACA | <i>Gypsy</i> | Lachesis_group0:107325-109982     |
| Ma_LTR_274 | repeat_TE0737658 | IRAP | ACCTTCCCTTAGCGTAAC   | ATGTGTCACTCAAGTCCG  | <i>Gypsy</i> | Lachesis_group0:107983-114174     |
| Ma_LTR_275 | repeat_TE0737663 | RBIP | CCCTGTCCCTTGGATAAA   | GCGTTTCTTTCTCTCCTTC | <i>Gypsy</i> | Lachesis_group0:117471-118273     |
| Ma_LTR_276 | repeat_TE0737964 | IRAP | GGAAGAAGGAGGACAAAAG  | CAACACACATACGCCACT  | <i>Gypsy</i> | Lachesis_group0:217965-220031     |
| Ma_LTR_277 | repeat_TE0737967 | RBIP | TCAGATGGAGTTGTGAGG   | GAGGCTAAACCCTACGAT  | <i>Gypsy</i> | Lachesis_group0:220033-221772     |
| Ma_LTR_278 | repeat_TE0738157 | ISBP | AAGAGGTTCTACGGAGTA   | CCAGAGTTATGGGTCAAC  | <i>Gypsy</i> | Lachesis_group0:282221-284374     |
| Ma_LTR_279 | repeat_TE0738158 | RBIP | GAAGTGTATGTGTCCAAGG  | CCAGGAAGAGAACAAGAC  | <i>Gypsy</i> | Lachesis_group0:284356-285902     |
| Ma_LTR_280 | repeat_TE0738159 | RBIP | GAAGTGTATGTGTCCAAGG  | CCAGGAAGAGAACAAGAC  | <i>Gypsy</i> | Lachesis_group0:284578-285933     |
| Ma_LTR_281 | repeat_TE0738167 | RBIP | AGAGGAAGAAGACAACCG   | GTCACAAAGGATGAGGGT  | <i>Gypsy</i> | Lachesis_group0:299198-301333     |
| Ma_LTR_282 | repeat_TE0765130 | IRAP | TCTTCCAGGTTTCTCTGC   | CCCGACACAAGGTAGTAAT | <i>Gypsy</i> | Lachesis_group0:11636132-11641275 |
| Ma_LTR_283 | repeat_TE0765739 | RBIP | CCCGAATCTAAGGTCAAAGT | CACGCAAGAAACACATCAC | <i>Gypsy</i> | Lachesis_group0:11895199-11897391 |
| Ma_LTR_284 | repeat_TE0765740 | IRAP | ATTTGGACCAGGCACACT   | AAGCACTCCGTCATCGTA  | <i>Gypsy</i> | Lachesis_group0:11896851-11899384 |
| Ma_LTR_285 | repeat_TE0765742 | RBIP | CAACTAACGAATCGCTGAGT | GGAAGAAGAGAATGTCGGA | <i>Gypsy</i> | Lachesis_group0:11902822-11909811 |
| Ma_LTR_286 | repeat_TE0765907 | IRAP | CGGATGATACGAAAGTGAG  | GCTTCTGTTGTTAGCCCAT | <i>Gypsy</i> | Lachesis_group0:11952710-11954058 |
| Ma_LTR_287 | repeat_TE0765911 | RBIP | AAGTGACCCGACATCACA   | ATGACGACATCTGCCAAG  | <i>Gypsy</i> | Lachesis_group0:11954727-11958976 |



|            |                  |      |                       |                      |              |                                   |
|------------|------------------|------|-----------------------|----------------------|--------------|-----------------------------------|
| Ma_LTR_288 | repeat_TE0765916 | IRAP | ACCTCTTGGAGTGATACT    | TTCTACCACGAACTACGAG  | <i>Gypsy</i> | Lachesis_group0:11975466-11977861 |
| Ma_LTR_289 | repeat_TE0765979 | RBIP | GGTGAGAGAACCGAGTTT    | TGGAGTTTCGTAGAGACG   | <i>Gypsy</i> | Lachesis_group0:11993134-11994012 |
| Ma_LTR_290 | repeat_TE0793015 | RBIP | ACTAAGGTTCCAGGCTGT    | GACTCATCCAACAATCCC   | <i>Gypsy</i> | Lachesis_group0:24664021-24665133 |
| Ma_LTR_291 | repeat_TE0793019 | RBIP | CTGGATTGAGAGAATACGG   | ACAAACAGTTCCTTACCC   | <i>Gypsy</i> | Lachesis_group0:24666775-24670495 |
| Ma_LTR_292 | repeat_TE0793030 | RBIP | GCAACTTTACATTCCAGCAC  | CAACCTTATTGTCCCAAGAC | <i>Gypsy</i> | Lachesis_group0:24684324-24685510 |
| Ma_LTR_293 | repeat_TE0793128 | RBIP | CGGCAAGGTAGAGAGAAGT   | AATGGGCTTTGGAGTAGG   | <i>Gypsy</i> | Lachesis_group0:24725739-24727786 |
| Ma_LTR_294 | repeat_TE0834252 | IRAP | GTTTAGAACCTGACCGCT    | GCTCCATCAAGTCCATCT   | <i>Gypsy</i> | Lachesis_group0:49878309-49881825 |
| Ma_LTR_295 | repeat_TE0834258 | RBIP | TGTTGAGTAGCAAGGCAG    | TAGGCAATAGAGAGCGTC   | <i>Gypsy</i> | Lachesis_group0:49884282-49886587 |
| Ma_LTR_296 | repeat_TE0834263 | IRAP | GGTGTAGGACTTATCTCACTC | ACCTTCCCTTAGCGTAAC   | <i>Gypsy</i> | Lachesis_group0:49889163-49892955 |
| Ma_LTR_297 | repeat_TE0834415 | IRAP | CAGGACTATCTCACCCTCA   | GACAGCAATGACAACTTCAC | <i>Gypsy</i> | Lachesis_group0:49973239-49974459 |
| Ma_LTR_298 | repeat_TE0834416 | IRAP | CAGGACTATCTCACCCTCA   | GACAGCAATGACAACTTCAC | <i>Gypsy</i> | Lachesis_group0:49973241-49974446 |
| Ma_LTR_299 | repeat_TE0834418 | RBIP | GTGAGCACCAAGAGTGTAT   | GATAGAAGTGGGATGAAGG  | <i>Gypsy</i> | Lachesis_group0:49974652-49975226 |
| Ma_LTR_300 | repeat_TE0834478 | IRAP | CTCTCACACATACACAAAGG  | ATCTGGAGTTCTGGAAGTC  | <i>Gypsy</i> | Lachesis_group0:49991246-49992031 |
| Ma_LTR_301 | repeat_TE1457295 | RBIP | CAAGCACGGTAAGTTAGC    | CGAGTTCAAGAGCACCTT   | <i>Gypsy</i> | Lachesis_group1:125980-132007     |
| Ma_LTR_302 | repeat_TE1457731 | RBIP | AAAGAGGACAAAGACCCG    | GCGTATGTGTGTTGACTA   | <i>Gypsy</i> | Lachesis_group1:280665-289952     |
| Ma_LTR_303 | repeat_TE1457734 | IRAP | ATGTCACTCCCATACTCAC   | AACTGCTCATCTGTAGCC   | <i>Gypsy</i> | Lachesis_group1:291734-299236     |
| Ma_LTR_304 | repeat_TE1482806 | IRAP | GGGTCTTCAACCTATCAGG   | CCTCCTTACAAATCCCAG   | <i>Gypsy</i> | Lachesis_group1:14805660-14818268 |
| Ma_LTR_305 | repeat_TE1482851 | RBIP | TAATGACACAGGGAGCCA    | GAGTCGTTGATGTTGCCT   | <i>Gypsy</i> | Lachesis_group1:14851947-14854121 |

|            |                  |      |                        |                      |              |                                     |
|------------|------------------|------|------------------------|----------------------|--------------|-------------------------------------|
| Ma_LTR_306 | repeat_TE1482902 | RBIP | TACTCGGAAGAGCGTTCT     | GTATCTCCTCAATGGATGC  | <i>Gypsy</i> | Lachesis_group1:14894444-14895870   |
| Ma_LTR_307 | repeat_TE1511354 | RBIP | GGTTGTTGTGTAGAAGCG     | AGTATTGAGCCACCAAGAC  | <i>Gypsy</i> | Lachesis_group1:32982365-32983758   |
| Ma_LTR_308 | repeat_TE1511454 | IRAP | GACAAGAGAGACAAGTTCAGAG | AAAGACACACACGCACAC   | <i>Gypsy</i> | Lachesis_group1:33113943-33115607   |
| Ma_LTR_309 | repeat_TE1511762 | IRAP | CACACACACACACTCAT      | TGTTTACTCCACTGGGTC   | <i>Gypsy</i> | Lachesis_group1:33227320-33228072   |
| Ma_LTR_310 | repeat_TE1511770 | IRAP | ATAGAACCTGACCGCTTG     | CATACGCATACACAACGC   | <i>Gypsy</i> | Lachesis_group1:33231252-33232505   |
| Ma_LTR_311 | repeat_TE1523154 | IRAP | ATCACTTCCAAGGGTCTG     | GAGGAGGGATTGTAATGCT  | <i>Gypsy</i> | Lachesis_group1:41821007-41829360   |
| Ma_LTR_312 | repeat_TE1523188 | RBIP | TATCTTTGACCCGTGGAG     | AAATAGGGACAAGGGACG   | <i>Gypsy</i> | Lachesis_group1:41861093-41862403   |
| Ma_LTR_313 | repeat_TE1575724 | IRAP | TGATTGCCTCTGTTACCC     | TTGTCTACTACCGATGCG   | <i>Gypsy</i> | Lachesis_group1:75391992-75393231   |
| Ma_LTR_314 | repeat_TE1575732 | RBIP | CATCAGCAAGTAATGCGG     | GCCCTTATGTGGAATAGG   | <i>Gypsy</i> | Lachesis_group1:75411765-75415494   |
| Ma_LTR_315 | repeat_TE1575753 | IRAP | AGCCACCTTATCCACTACG    | CTCAAATCCGACCCTACA   | <i>Gypsy</i> | Lachesis_group1:75431420-75433647   |
| Ma_LTR_316 | repeat_TE1575759 | RBIP | GCGGTGTAGTTTCACTCAT    | CATCCTCTAAGATTGGGAC  | <i>Gypsy</i> | Lachesis_group1:75438749-75442662   |
| Ma_LTR_317 | repeat_TE1575788 | RBIP | TTGTTTGAGGACGAGGTC     | CCGTAGGAAGCCATACAT   | <i>Gypsy</i> | Lachesis_group1:75463065-75465331   |
| Ma_LTR_318 | repeat_TE1575813 | RBIP | CTGTATGTATCCCAACGAC    | TATGGAGCCCTTAGGAAG   | <i>Gypsy</i> | Lachesis_group1:75480485-75481402   |
| Ma_LTR_319 | repeat_TE1575833 | RBIP | TTGTCTACTACCGATGCG     | TGATTGCCTCTGTTACCC   | <i>Gypsy</i> | Lachesis_group1:75491208-75492446   |
| Ma_LTR_320 | repeat_TE1605205 | ISBP | TCTCGTCAAGAGGTGTCAC    | TGGTGTAAGATGGCGAAG   | <i>Gypsy</i> | Lachesis_group1:91847762-91853114   |
| Ma_LTR_321 | repeat_TE1605206 | ISBP | GAGGATTCCCAACATCTTAG   | GGTCTCGGTGAAAGTG TAG | <i>Gypsy</i> | Lachesis_group1:91847885-91852213   |
| Ma_LTR_322 | repeat_TE1605315 | ISBP | CGTTTCAGTAATCCACCC     | TTTCTGGCGAGTTGTCAC   | <i>Gypsy</i> | Lachesis_group1:91882513-91891826   |
| Ma_LTR_323 | repeat_TE1628673 | RBIP | TTAGGACAATCCCAGTGG     | TACTGGAATGGACCGTGA   | <i>Gypsy</i> | Lachesis_group1:102933349-102938515 |

|            |                  |      |                      |                       |              |                                     |
|------------|------------------|------|----------------------|-----------------------|--------------|-------------------------------------|
| Ma_LTR_324 | repeat_TE1628927 | IRAP | GGTATCAGAGCCTGGTTAG  | AAACAGTCCTCAGTTCCTC   | <i>Gypsy</i> | Lachesis_group1:103054781-103059320 |
| Ma_LTR_325 | repeat_TE1628928 | IRAP | GAGTGAATCCTGTTACCG   | CTGTCAAAGTCTCATTTCTC  | <i>Gypsy</i> | Lachesis_group1:103059321-103063429 |
| Ma_LTR_326 | repeat_TE1740644 | RBIP | CGGGAAATCTCCACAACT   | GAAGGGAAATGGTAGCATC   | <i>Gypsy</i> | Lachesis_group2:17314306-17317740   |
| Ma_LTR_327 | repeat_TE1740716 | RBIP | TCTACTTCTCTCTCAGGCG  | CGTGTGACGGTTGAATAC    | <i>Gypsy</i> | Lachesis_group2:17338120-17344094   |
| Ma_LTR_328 | repeat_TE1740793 | IRAP | ACACACGCACACACACTCT  | CAGCCCAGTTCCTTGTTA    | <i>Gypsy</i> | Lachesis_group2:17385375-17388963   |
| Ma_LTR_329 | repeat_TE1740795 | IRAP | CCTGTCTAAAGTCGCAAG   | CAGAAGATGGTGGTCACT    | <i>Gypsy</i> | Lachesis_group2:17388731-17395516   |
| Ma_LTR_330 | repeat_TE1740796 | RBIP | GTTTCGGTTCTGATGGTG   | ACAAATCCACACACAGCC    | <i>Gypsy</i> | Lachesis_group2:17395517-17396693   |
| Ma_LTR_331 | repeat_TE1741039 | RBIP | CTAATGCCTCCCAGTTTAC  | GAGTTGTCAGTAGTATGGACC | <i>Gypsy</i> | Lachesis_group2:17471682-17475434   |
| Ma_LTR_332 | repeat_TE1741050 | ISBP | CGATAAGTCGCAAACCTC   | TAGGATGAAACAGTGCCC    | <i>Gypsy</i> | Lachesis_group2:17490624-17495073   |
| Ma_LTR_333 | repeat_TE1741052 | RBIP | CGACATTCGTCCTCAACA   | ACTCAACGGGAGCCATTA    | <i>Gypsy</i> | Lachesis_group2:17496772-17498108   |
| Ma_LTR_334 | repeat_TE1741356 | IRAP | GTAAACTGGAGGTGTGGATA | GAGGAAGAAGAGAGAGGAAT  | <i>Gypsy</i> | Lachesis_group2:17596876-17598364   |
| Ma_LTR_335 | repeat_TE1792011 | RBIP | TGCGTTACCTGAGACCAT   | AAGTGTTAGCCTGGACTGG   | <i>Gypsy</i> | Lachesis_group2:47357582-47361917   |
| Ma_LTR_336 | repeat_TE1792027 | IRAP | GAGGAAGTAGACGCTTATTG | GTTGGTGGTGTCAATCAC    | <i>Gypsy</i> | Lachesis_group2:47375213-47378283   |
| Ma_LTR_337 | repeat_TE1792032 | RBIP | AGCAAAGTAGGGACGACT   | TGATAGTGACAACTCCGC    | <i>Gypsy</i> | Lachesis_group2:47379502-47381080   |
| Ma_LTR_338 | repeat_TE1819088 | RBIP | CATAACTGACTCCCGAAC   | CACCGACTATCCCTAATG    | <i>Gypsy</i> | Lachesis_group2:65998091-66004471   |
| Ma_LTR_339 | repeat_TE1819089 | IRAP | GCTACAATACTCGGCTAAAC | GTCATTACTCGCAACACC    | <i>Gypsy</i> | Lachesis_group2:66001587-66004709   |
| Ma_LTR_340 | repeat_TE1819098 | IRAP | ACCTTCCCTTAGCGTAAC   | CCGTTCTATCTTATGTGTC   | <i>Gypsy</i> | Lachesis_group2:66015781-66022059   |
| Ma_LTR_341 | repeat_TE1819129 | RBIP | GACTTACCCAACAATCCC   | CTCTCAAATCTCACTGGC    | <i>Gypsy</i> | Lachesis_group2:66042537-66043527   |

|            |                  |      |                     |                      |              |                                   |
|------------|------------------|------|---------------------|----------------------|--------------|-----------------------------------|
| Ma_LTR_342 | repeat_TE1819279 | IRAP | TGAGTCTTGAGTCCCTTG  | GATTACTGGTATGCCCTTC  | <i>Gypsy</i> | Lachesis_group2:66124859-66127312 |
| Ma_LTR_343 | repeat_TE1853215 | IRAP | TGTCCTTGTTGGGTATCC  | GTAAAGTTGATGCGGAGTC  | <i>Gypsy</i> | Lachesis_group2:88956367-88960693 |
| Ma_LTR_344 | repeat_TE1860476 | RBIP | TATGAGGTCTCTGCCCTT  | GCTGCTTGCTGATTAGG    | <i>Gypsy</i> | Lachesis_group2:93050820-93052081 |
| Ma_LTR_345 | repeat_TE1860478 | IRAP | TCCTCCTGAGAATACCCT  | AGAGTGCTACTTGTTGGG   | <i>Gypsy</i> | Lachesis_group2:93051721-93055869 |
| Ma_LTR_346 | repeat_TE1860489 | RBIP | GCAAGTCCCAGAGAAGAT  | CCTAATACATCAGACAAGGC | <i>Gypsy</i> | Lachesis_group2:93076951-93081719 |
| Ma_LTR_347 | repeat_TE1860511 | IRAP | GACTCATCCAACAATCCC  | GAAGGAATCTGGCTAAAGC  | <i>Gypsy</i> | Lachesis_group2:93122525-93123818 |
| Ma_LTR_348 | repeat_TE1860639 | RBIP | CAAACCTGGCATTACAGGC | TCGTCTTAGGAGTCGCTCT  | <i>Gypsy</i> | Lachesis_group2:93176983-93180527 |
| Ma_LTR_349 | repeat_TE1860968 | RBIP | GCGGGACTATCATTCTCT  | CAACAGCCTATTCATCTGAC | <i>Gypsy</i> | Lachesis_group2:93425265-93427252 |
| Ma_LTR_350 | repeat_TE1860986 | RBIP | TCACAGAGTTTGAGTCCC  | GAAGAAGAAGGTGGGTTC   | <i>Gypsy</i> | Lachesis_group2:93436681-93438161 |
