# Supplementary figures and images for: Genome-Wide Identification and Development of LTR Retrotransposon-Based Molecular Markers for the Melilotus Genus
Source: MDPI journal article supplement (doi:10.3390/plants10050890), 2021-04-28

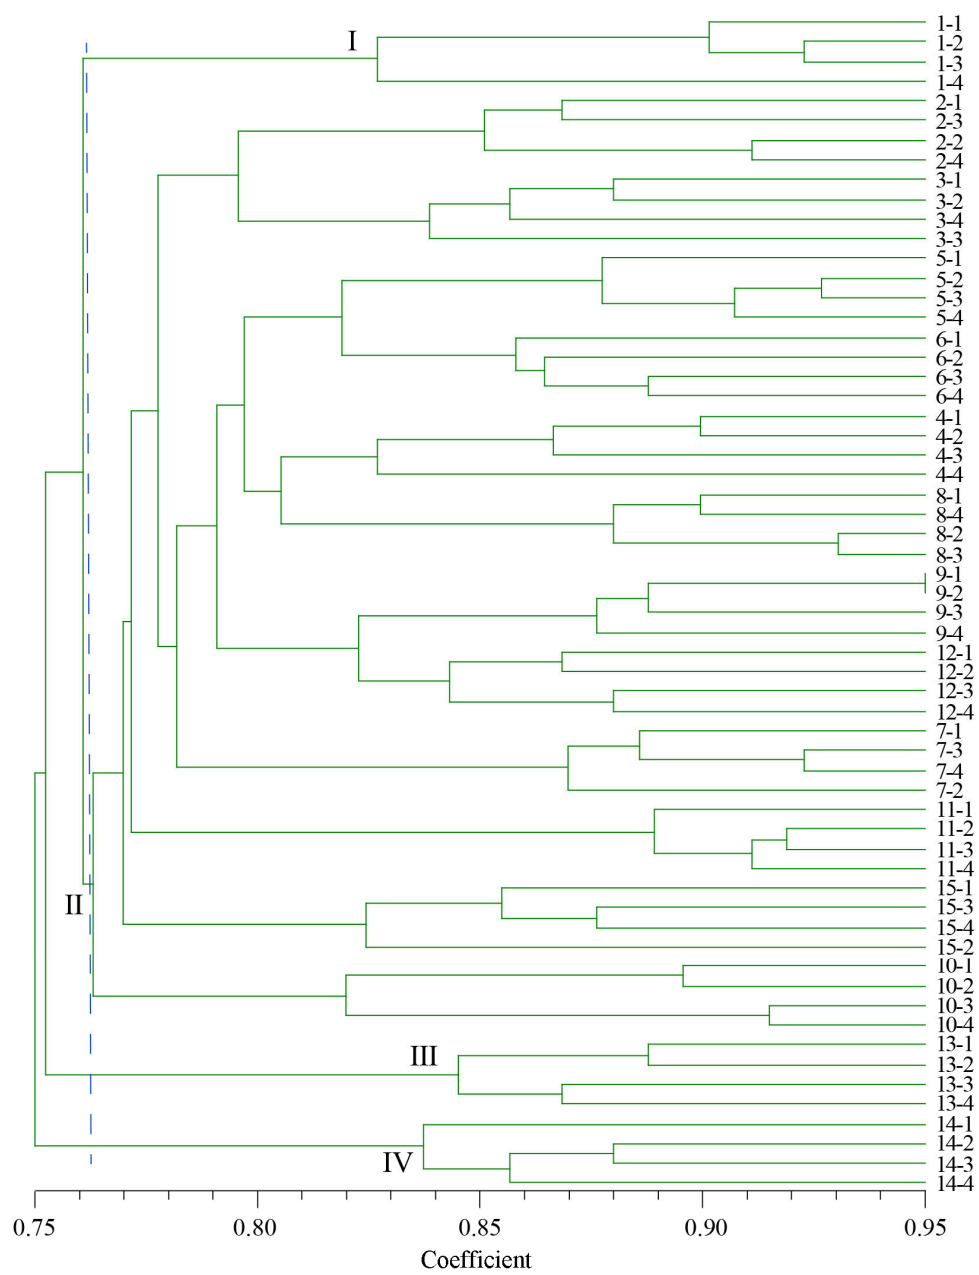

Supplement: s1 [file s1]

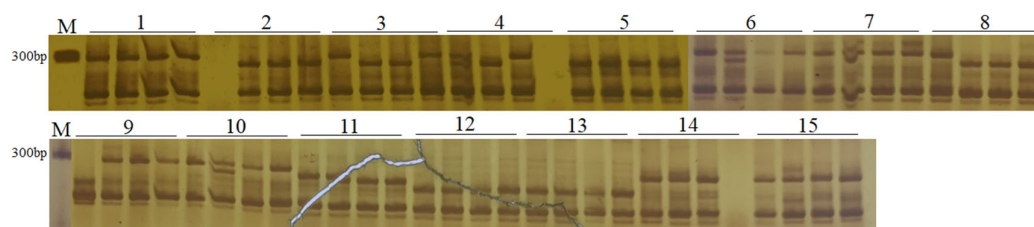

Primer 25\_RBIP

Supplement: s1 [file s1]
